# Supplementary material for: D25V apolipoprotein C-III variant causes dominant hereditary systemic amyloidosis and confers cardiovascular protective lipoprotein profile
Source: PubMed Central journal article supplement (PMC4735822; doi:10.1038/ncomms10353), 2016-01-21
Supplement: ncomms10353-s1.pdf [file ncomms10353-s1.pdf]

## SUPPLEMENTARY INFORMATION

### SUPPLEMENTARY FIGURES

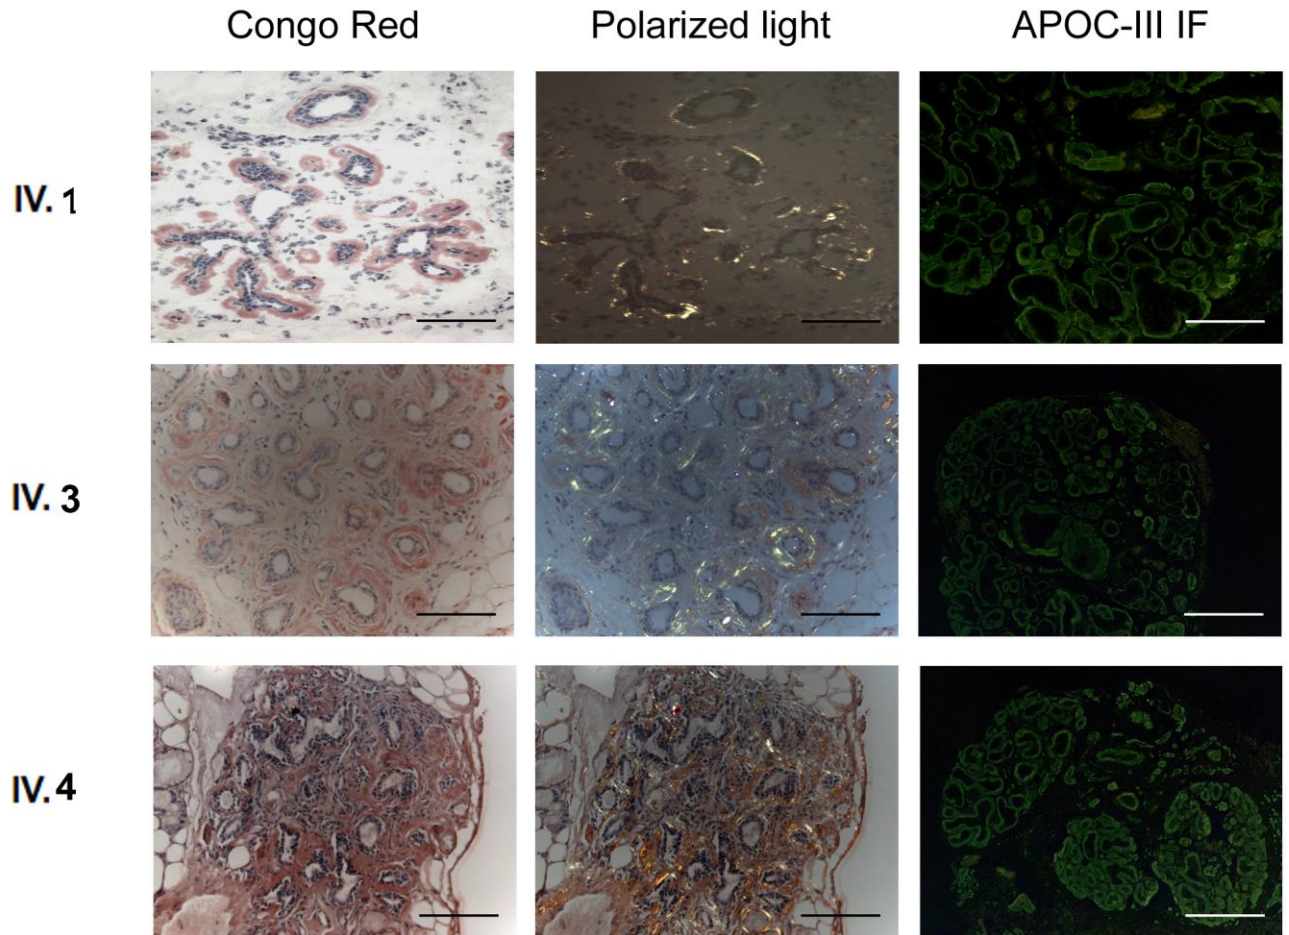

**Supplementary Fig. 1. Histology of salivary gland tissue.** Amyloid deposits in the salivary gland tissue from three additional D25V-carriers IV.1, IV.3 stained with Congo red, exhibited green birefringence when viewed under polarized light and were immunoreactive for apoC-III antibody in all D25V-carriers. Scale bar: 100  $\mu$ m.

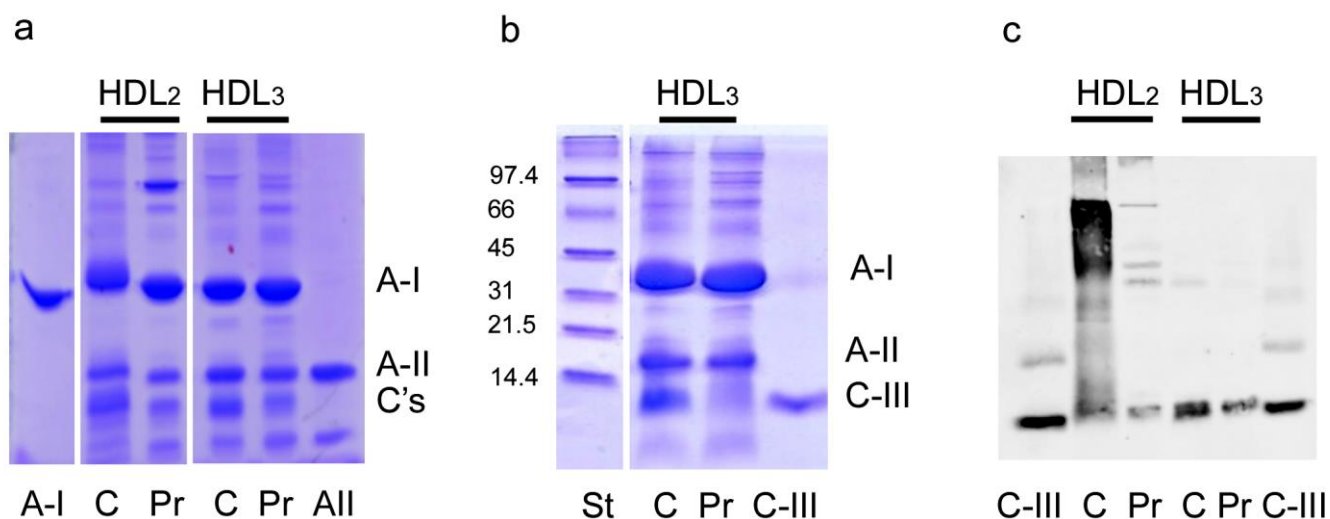

**Supplementary Fig. 2. Analysis of HDL apolipoproteins.** (a) SDS 15% PAGE of HDL<sub>2</sub> and HDL<sub>3</sub> from the proband III.3 and the control subject (12  $\mu$ g protein per lane) carried out under reducing conditions. In the first and last lane, respectively, purified human apoA-I (28 kDa) and human dimeric apoA-II (17 kDa), the major HDL apolipoproteins, were run as standards. (b) SDS 15% PAGE of HDL<sub>3</sub> from the proband and the control subject (12  $\mu$ g protein per lane) was carried out as in (a). Low Range SDS-PAGE Standards (kDa) (LMW BioRad) were run in the first lane, and purified human apoC-III in the last lane as standard (4  $\mu$ g per lane). SDS-PAGE for HDL<sub>2</sub> and HDL<sub>3</sub> were replicated 7 times, using as standards either purified apoA-I, apoA-II and apoC-III or LMW. (c) Western blot developed with a primary rabbit anti-human apoC-III antibody (1  $\mu$ g ml<sup>-1</sup>, Abnova). Isolated apoC-III (8.8 kDa, 4  $\mu$ g per lane) was loaded in the first and last lanes as standard controls. Western blots for apoC-III were replicated 3 times. A-I, apolipoprotein A-I; A-II, apolipoprotein A-II; C-III, apolipoprotein C-III; C, control subject; Pr, proband III.3; A-II, apolipoprotein A-II; C-III, apolipoprotein C-III.

**Supplementary Table 1. Amyloid proteome of salivary gland.**

| Entry Name (a)                                                       | Accession number (b) | MW (kDa) | Sample 1 | Sample 2 |
|----------------------------------------------------------------------|----------------------|----------|----------|----------|
| Serum albumin                                                        | ALBU_HUMAN           | 69       | 22       | 20       |
| Collagen alpha-3(VI) chain                                           | CO6A3_HUMAN          | 34       | 17       | 16       |
| <b>Apolipoprotein E</b>                                              | <b>APOE_HUMAN</b>    | 36       | 17       | 13       |
| Keratin, type I cytoskeletal 10                                      | K1C10_HUMAN          | 58       | 15       | 14       |
| Lactotransferrin                                                     | TRFL_HUMAN           | 78       | 15       | 14       |
| <b>Apolipoprotein C-III</b>                                          | <b>APOC3_HUMAN</b>   | 11       | 13       | 8        |
| Keratin, type II cytoskeletal 2 epidermal                            | K22E_HUMAN           | 65       | 12       | 10       |
| Keratin, type II cytoskeletal 1                                      | K2C1_HUMAN           | 66       | 11       | 10       |
| Vitronectin                                                          | VTNC_HUMAN           | 54       | 10       | 9        |
| <b>Serum amyloid P-component</b>                                     | <b>SAMP_HUMAN</b>    | 25       | 10       | 9        |
| Vimentin                                                             | VIME_HUMAN           | 54       | 9        | 9        |
| Basement membrane-specific heparan sulfate proteoglycan core protein | PGBM_HUMAN           | 47       | 8        | 8        |
| Keratin, type I cytoskeletal 19                                      | K1C19_HUMAN          | 44       | 8        | 8        |
| Hemoglobin subunit beta                                              | HBB_HUMAN            | 16       | 8        | 7        |
| Keratin, type II cytoskeletal 7                                      | K2C7_HUMAN           | 51       | 6        | 6        |
| Apolipoprotein A-IV                                                  | APOA4_HUMAN          | 45       | 6        | 6        |
| Keratin, type II cytoskeletal 5                                      | K2C5_HUMAN           | 62       | 6        | 6        |
| Keratin, type I cytoskeletal 14                                      | K1C14_HUMAN          | 51       | 5        | 5        |
| Collagen alpha-2(VI) chain                                           | CO6A2_HUMAN          | 11       | 4        | 4        |
| Actin, cytoplasmic 1                                                 | ACTB_HUMAN           | 42       | 4        | 3        |
| Complement component C9                                              | CO9_HUMAN            | 65       | 3        | 2        |

Amyloid proteome of salivary gland from individual IV.3 detected apoC-III protein along with apoE and SAP.

**Supplementary Table 2. Primer sequences for PCR amplification of *APOC3*.**

| PRIMER SEQUENCES FOR PCR AMPLIFICATION OF THE <i>APOC3</i> GENE |                  |                                |                   |
|-----------------------------------------------------------------|------------------|--------------------------------|-------------------|
|                                                                 | Primer name      | Primer sequence (5'->3')       | Product size (bp) |
| Promoter region                                                 | <i>APOC3_5PF</i> | gaaggtgaacgagagaatcagtcctg     | 511               |
|                                                                 | <i>APOC3_5PR</i> | gcctcgggcccatctcagcctttcacactg |                   |
| Exon 1                                                          | <i>APOC3_1F</i>  | caagccacccacttgttctc           | 600               |
|                                                                 | <i>APOC3_1R</i>  | tccgaggcttccttagctc            |                   |
| Exon 2                                                          | <i>APOC3_2F</i>  | cttctggcagaccagctaa            | 250               |
|                                                                 | <i>APOC3_2R</i>  | gaccaccattgggactg              |                   |
| Exon 3                                                          | <i>APOC3_3F</i>  | atgggtggtcaagcagga             | 296               |
|                                                                 | <i>APOC3_3R</i>  | gagcacctcattccattgt            |                   |
| Exon 4                                                          | <i>APOC3_4F</i>  | ctgactggtgtcgtccagtg           | 288               |
|                                                                 | <i>APOC3_4R</i>  | ccctggagattgcaggac             |                   |
| 3'UTR                                                           | <i>APOC3_3PF</i> | ggagcaccgtaaggacaag            | 562               |
|                                                                 | <i>APOC3_3PR</i> | ggggcacacactcaagtcac           |                   |
